# Supplementary material for: Use of a maternal newborn audit and feedback system in Ontario: a collective case study
Source: PubMed Central journal article supplement — BMJ Qual Saf. 2019 Feb 16;28(8):635–44. doi: 10.1136/bmjqs-2018-008354 (PMC6663061; doi:10.1136/bmjqs-2018-008354), 2019-02-16
Supplement: bmjqs-2018-008354supp001.pdf [file bmjqs-2018-008354supp001.pdf]

### Supplementary Table 1 Interview and Focus Group Questions\*

---

1. The Maternal Newborn Dashboard (Dashboard) was implemented in maternal-newborn hospitals in Ontario in November 2012. Tell us about the impact of the implementation of the Dashboard in your organization.
  2. Tell me about some facilitators that helped you or your organization to implement and utilize the dashboard.
  3. Tell me about some barriers you or your organization encountered implementing and utilizing the dashboard.
  4. What is the most helpful thing about the Dashboard for you personally in your role? What is the most helpful thing about the Dashboard for your organization as a whole?
  5. How could BORN improve the Dashboard?
  6. Overall, how would you describe the response to clinical practice change in your organization?
  7. Has your organization addressed any of the 6 key performance indicators? If yes:
    - Which KPI(s) did your organization address?
    - Walk me through the process your organization used to identify the practice issue to change.
    - Walk me through the process your organization used to make this change.
    - Tell me about how your organization is ensuring the sustainability of this change.
    - Reflecting on the change process used, what worked well?
    - Reflecting on the change process used, what would you change?
  8. Though we have attempted to be thorough in our questions, is there anything that perhaps we didn't cover that you think would be important to note in terms of use of the dashboard, KPI data, or change process?
- 

*\*Not all questions were asked of all participants; probes are not included in this table  
BORN, Better Outcomes Registry & Network Ontario  
KPI, Key Performance Indicator*
