# Supplementary material for: Use of a maternal newborn audit and feedback system in Ontario: a collective case study
Source: PubMed Central journal article supplement — BMJ Qual Saf. 2019 Feb 16;28(8):635–44. doi: 10.1136/bmjqs-2018-008354 (PMC6663061; doi:10.1136/bmjqs-2018-008354), 2019-02-16
Supplement: bmjqs-2018-008354supp002.pdf [file bmjqs-2018-008354supp002.pdf]

**Supplementary Table 2** Guiding questions used for writing of interpretive summaries as part of analysis for each organization

- 
1. Did the Dashboard trigger change?
  2. How is the Dashboard used?
  3. Who is the Dashboard data shared with?
  4. How does change happen at this site?
  5. Are there any key characteristics/contextual information about this site?
  6. Did I expect to hear this information from this site based on the selection criteria data?
  7. What are the consistencies between participants?
  8. What are the inconsistencies between participants?
  9. Are there any quality improvement success stories of “going green” on a KPI?
- 

*KPI, Key Performance Indicator*
