# Supplementary material for: Use of a maternal newborn audit and feedback system in Ontario: a collective case study
Source: PubMed Central journal article supplement — BMJ Qual Saf. 2019 Feb 16;28(8):635–44. doi: 10.1136/bmjqs-2018-008354 (PMC6663061; doi:10.1136/bmjqs-2018-008354), 2019-02-16
Supplement: bmjqs-2018-008354supp003.pdf [file bmjqs-2018-008354supp003.pdf]

**Supplementary Table 3** Data collection methods and participants

| <b>Data source</b>           | <b>Number of sites<br/>N=14</b> | <b>Number of participants<br/>N=107</b> | <b>Roles of participants</b>                                                                                                                                                                                                                                                                                                                                                                                                                                                                                                                                                                                                                                                                                                                                                                                                            |
|------------------------------|---------------------------------|-----------------------------------------|-----------------------------------------------------------------------------------------------------------------------------------------------------------------------------------------------------------------------------------------------------------------------------------------------------------------------------------------------------------------------------------------------------------------------------------------------------------------------------------------------------------------------------------------------------------------------------------------------------------------------------------------------------------------------------------------------------------------------------------------------------------------------------------------------------------------------------------------|
| Focus group (n=15)           | 12                              | 79                                      | <ul style="list-style-type: none"> <li>• Manager (21 from 12 sites)</li> <li>• Registered nurse (19 from 11 sites)</li> <li>• Obstetrician (13 from 10 sites)</li> <li>• Program director (8 from 7 sites)</li> <li>• Pediatrician (7 from 3 sites)</li> <li>• Nurse educator (6 from 4 sites)</li> <li>• Clinical resource nurse (5 from 3 sites)</li> <li>• Midwife (5 from 5 sites)</li> <li>• Advanced practice nurse(4 from 4 sites)</li> <li>• Analyst (3 from 3 sites)</li> <li>• Clerk (3 from 1 site)</li> <li>• Family physician (2 from 2 sites)</li> <li>• Vice President (2 from 2 sites)</li> <li>• Other (2 from 2 sites)</li> <li>• Registered practical nurse (1 from 1 site)</li> <li>• Lab technician (1 from 1 site)</li> <li>• Parent (1 from 1 site)</li> <li>• BORN Coordinator (4 covering 12 sites)</li> </ul> |
| Dyadic interview (n=2)       | 1                               | 4                                       |                                                                                                                                                                                                                                                                                                                                                                                                                                                                                                                                                                                                                                                                                                                                                                                                                                         |
| Individual interview (n=24)* | 6                               | 24                                      |                                                                                                                                                                                                                                                                                                                                                                                                                                                                                                                                                                                                                                                                                                                                                                                                                                         |
| Document review              | 7                               | N/A                                     | N/A                                                                                                                                                                                                                                                                                                                                                                                                                                                                                                                                                                                                                                                                                                                                                                                                                                     |
| Observations at meetings     | 4                               | N/A                                     | N/A                                                                                                                                                                                                                                                                                                                                                                                                                                                                                                                                                                                                                                                                                                                                                                                                                                     |
| Photographs                  | 10                              | N/A                                     | N/A                                                                                                                                                                                                                                                                                                                                                                                                                                                                                                                                                                                                                                                                                                                                                                                                                                     |
| Unit tours                   | 12                              | N/A                                     | N/A                                                                                                                                                                                                                                                                                                                                                                                                                                                                                                                                                                                                                                                                                                                                                                                                                                     |

*\*17 interviews were conducted in person, 7 by telephone  
BORN, Better Outcomes Registry & Network Ontario*
